# Supplementary material for: Expression Signatures of Metastatic Capacity in a Genetic Mouse Model of Lung Adenocarcinoma
Source: PubMed Central journal article supplement (PMC2671160; doi:10.1371/journal.pone.0005401), 2009-04-30
Supplement: pone.0005401.s004.pdf [file pone.0005401.s004.pdf]

# Expression Signatures of Metastatic Capacity in a Genetic Mouse Model of Lung Adenocarcinoma

Supporting Document 2

(Comparison of mouse metastasis signature with other metastasis signatures)

# Multiclass cancer diagnosis using tumor gene expression signatures

Sridhar Ramaswamy<sup>\*\*†</sup>, Pablo Tamayo<sup>\*</sup>, Ryan Rifkin<sup>\*\*</sup>, Sayan Mukherjee<sup>\*\*</sup>, Chen-Hsiang Yeang<sup>\*§</sup>, Michael Angelo<sup>\*</sup>, Christine Ladd<sup>\*</sup>, Michael Reich<sup>\*</sup>, Eva Latulippe<sup>¶</sup>, Jill P. Mesirov<sup>\*</sup>, Tomaso Poggio<sup>‡</sup>, William Gerald<sup>¶</sup>, Massimo Loda<sup>¶</sup>, Eric S. Lander<sup>\*,\*\*</sup>, and Todd R. Golub<sup>\*,\*\*\*</sup>

<sup>\*</sup>Whitehead Institute/Massachusetts Institute of Technology Center for Genome Research, Cambridge, MA 02138; Departments of <sup>†</sup>Adult and <sup>\*\*</sup>Pediatric Oncology, Dana-Farber Cancer Institute/Harvard Medical School, Boston, MA 02115; <sup>‡</sup>Department of Pathology, Brigham and Women's Hospital, Boston, MA 02115; <sup>¶</sup>Department of Pathology, Memorial Sloan-Kettering Cancer Center, New York, NY 10021; and Departments of <sup>\*\*\*</sup>Biology, <sup>\*\*</sup>McGovern Institute, Center for Brain and Computational Learning, and <sup>§</sup>Artificial Intelligence Laboratory, Massachusetts Institute of Technology, Cambridge, MA 02139

Contributed by Eric S. Lander, October 23, 2001

- “Global Cancer Map” (GCM) of multiple tumor types, including metastases
- PNAS, 2001 Dec 18;98(26):15149-54.
- Compare human metastasis-associated genes with mouse model metastasis-associated genes

# Intersection of genes both high in k-ras/p53mut mouse metastasis and genes high in human tumor metastases

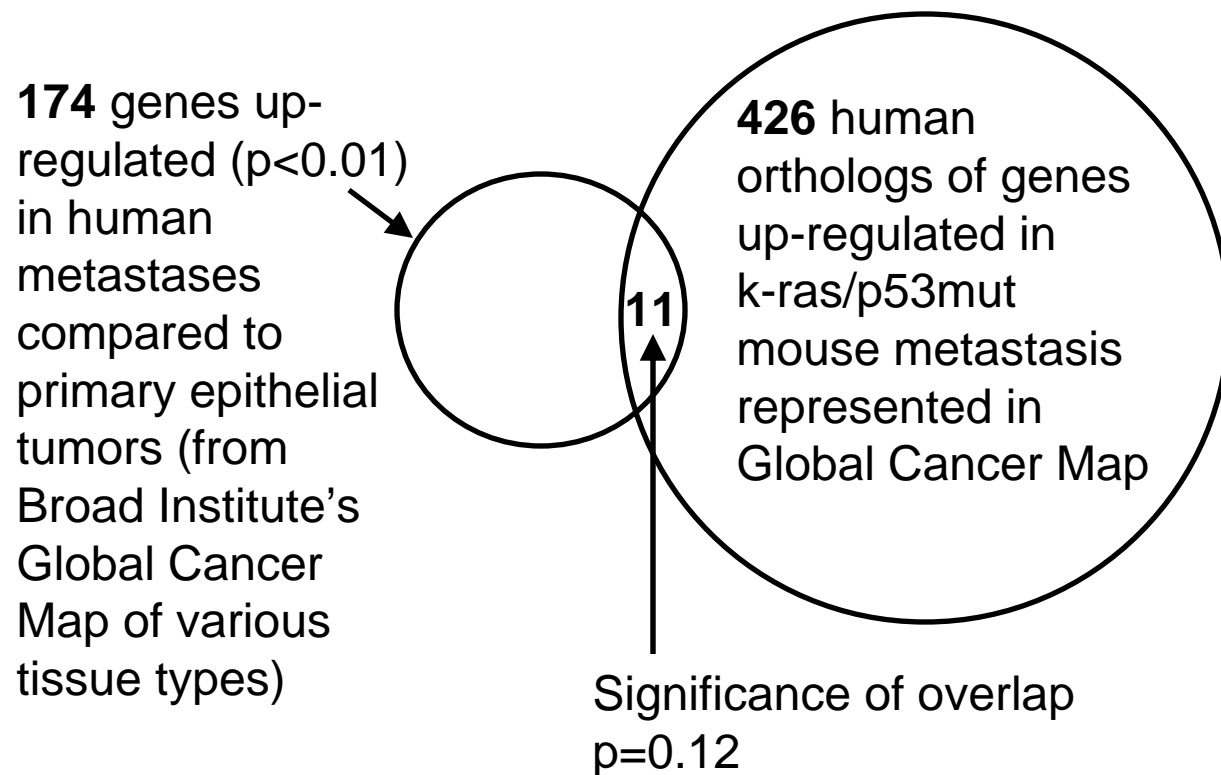

(10052 genes represented in GCM dataset.)

If we relax statistical cutoffs, do see significant overlap between human and mouse systems

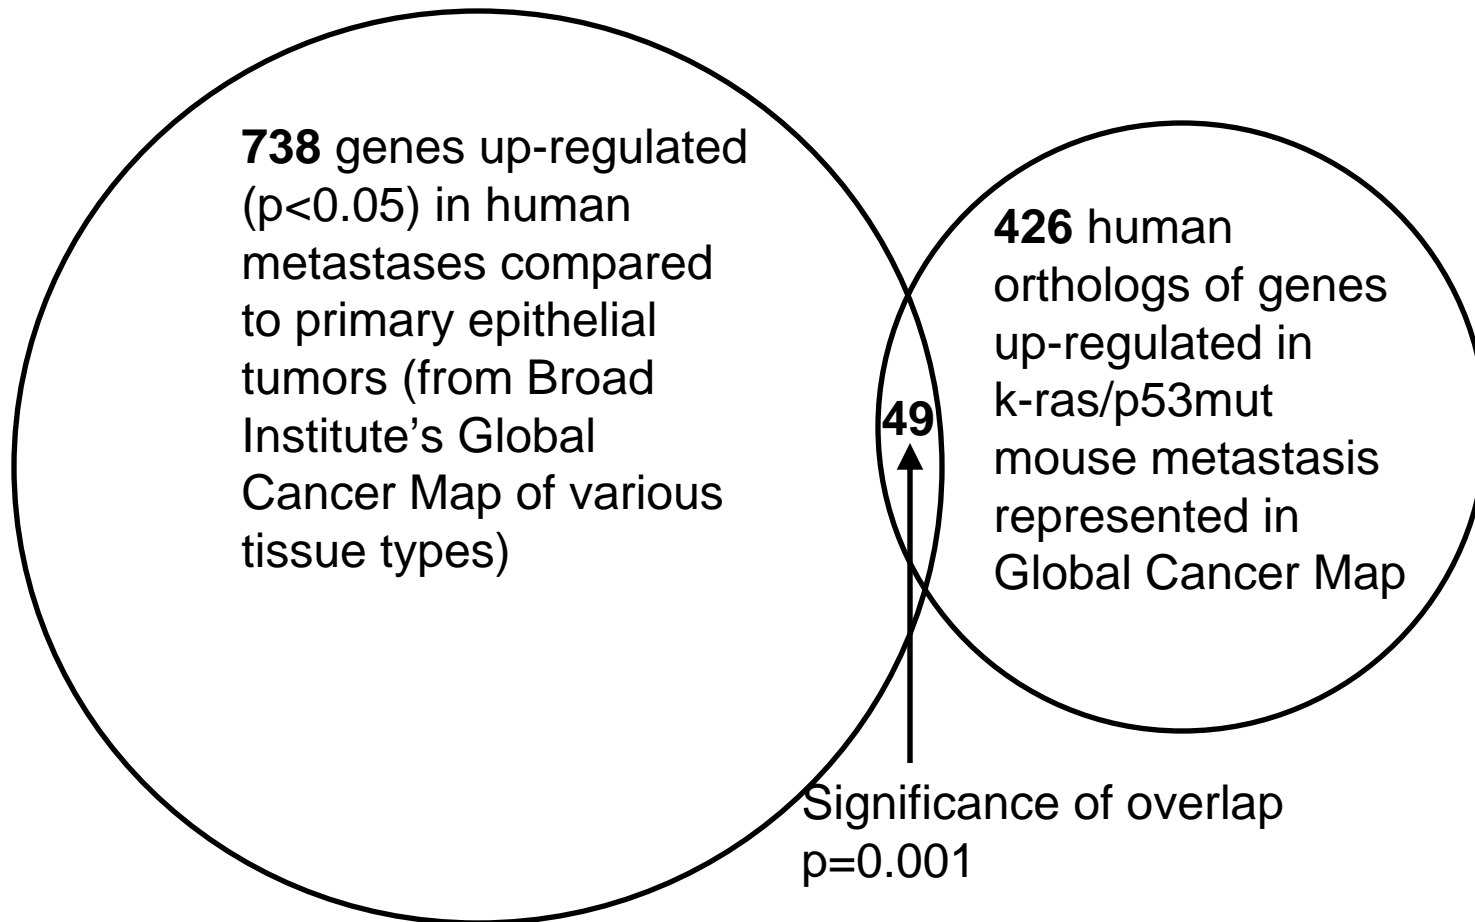

(10052 genes represented in GCM dataset.)

| Entrez ID | Name     | Title                                                                                        |
|-----------|----------|----------------------------------------------------------------------------------------------|
| 1278      | COL1A2   | collagen, type I, alpha 2                                                                    |
| 94239     | H2AFV    | H2A histone family, member V                                                                 |
| 2199      | FBLN2    | fibulin 2                                                                                    |
| 4085      | MAD2L1   | MAD2 mitotic arrest deficient-like 1 (yeast)                                                 |
| 2146      | EZH2     | enhancer of zeste homolog 2 (Drosophila)                                                     |
| 6624      | FSCN1    | fascin homolog 1, actin-bundling protein (Strongylocentrotus purpuratus)                     |
| 4605      | MYBL2    | v-myb myeloblastosis viral oncogene homolog (avian)-like 2                                   |
| 1277      | COL1A1   | collagen, type I, alpha 1                                                                    |
| 1545      | CYP1B1   | cytochrome P450, family 1, subfamily B, polypeptide 1                                        |
| 8880      | FUBP1    | Far upstream element (FUSE) binding protein 1                                                |
| 79101     | JOSD3    | Josephin domain containing 3                                                                 |
| 388753    | C1orf31  | chromosome 1 open reading frame 31                                                           |
| 1725      | DHPS     | deoxyhypusine synthase                                                                       |
| 2000      | ELF4     | E74-like factor 4 (ets domain transcription factor)                                          |
| 2305      | FOXM1    | forkhead box M1                                                                              |
| 3181      | HNRPA2B1 | heterogeneous nuclear ribonucleoprotein A2/B1                                                |
| 3192      | HNRPU    | heterogeneous nuclear ribonucleoprotein U (scaffold attachment factor A)                     |
| 4591      | TRIM37   | tripartite motif-containing 37                                                               |
| 11167     | FSTL1    | folliculin-like 1                                                                            |
| 10531     | PITRM1   | pitriysin metalloproteinase 1                                                                |
| 27258     | LSM3     | LSM3 homolog, U6 small nuclear RNA associated (S. cerevisiae)                                |
| 2113      | ETS1     | v-ets erythroblastosis virus E26 oncogene homolog 1 (avian)                                  |
| 3998      | LMAN1    | Lectin, mannose-binding, 1                                                                   |
| 3035      | HARS     | histidyl-tRNA synthetase                                                                     |
| 10658     | CUGBP1   | CUG triplet repeat, RNA binding protein 1                                                    |
| 332       | BIRC5    | baculoviral IAP repeat-containing 5 (survivin)                                               |
| 9055      | PRC1     | protein regulator of cytokinesis 1                                                           |
| 10411     | RAPGEF3  | Rap guanine nucleotide exchange factor (GEF) 3                                               |
| 56262     | LRRC8A   | leucine rich repeat containing 8 family, member A                                            |
| 28989     | C9orf32  | chromosome 9 open reading frame 32                                                           |
| 3609      | ILF3     | interleukin enhancer binding factor 3, 90kDa                                                 |
| 5176      | SERPINF1 | serpin peptidase inhibitor, clade F (alpha-2 antiplasmin, pigment epithelium derived factor) |
| 87178     | PNPT1    | polyribonucleotide nucleotidyltransferase 1                                                  |
| 7070      | THY1     | Thy-1 cell surface antigen                                                                   |
| 8078      | USP5     | ubiquitin specific peptidase 5 (isopeptidase T)                                              |
| 9564      | BCAR1    | breast cancer anti-estrogen resistance 1                                                     |
| 6118      | RPA2     | replication protein A2, 32kDa                                                                |
| 10432     | RBM14    | RNA binding motif protein 14                                                                 |
| 56943     | ENY2     | enhancer of yellow 2 homolog (Drosophila)                                                    |
| 1281      | COL3A1   | collagen, type III, alpha 1 (Ehlers-Danlos syndrome type IV, autosomal dominant)             |
| 8565      | YARS     | tyrosyl-tRNA synthetase                                                                      |
| 92400     | RBM18    | RNA binding motif protein 18                                                                 |
| 1786      | DNMT1    | DNA (cytosine-5-)-methyltransferase 1                                                        |
| 94104     | C21orf66 | chromosome 21 open reading frame 66                                                          |
| 4150      | MAZ      | MYC-associated zinc finger protein (purine-binding transcription factor)                     |
| 11004     | KIF2C    | kinesin family member 2C                                                                     |
| 5984      | RFC4     | replication factor C (activator 1) 4, 37kDa                                                  |
| 8239      | USP9X    | ubiquitin specific peptidase 9, X-linked                                                     |
| 1164      | CKS2     | CDC28 protein kinase regulatory subunit 2                                                    |

- The list of 49 genes that were found high in both the mouse metastasis signature ( $P < 0.01$ , paired t-test) and high in metastasis versus primary samples ( $P < 0.05$ , unpaired t-test)

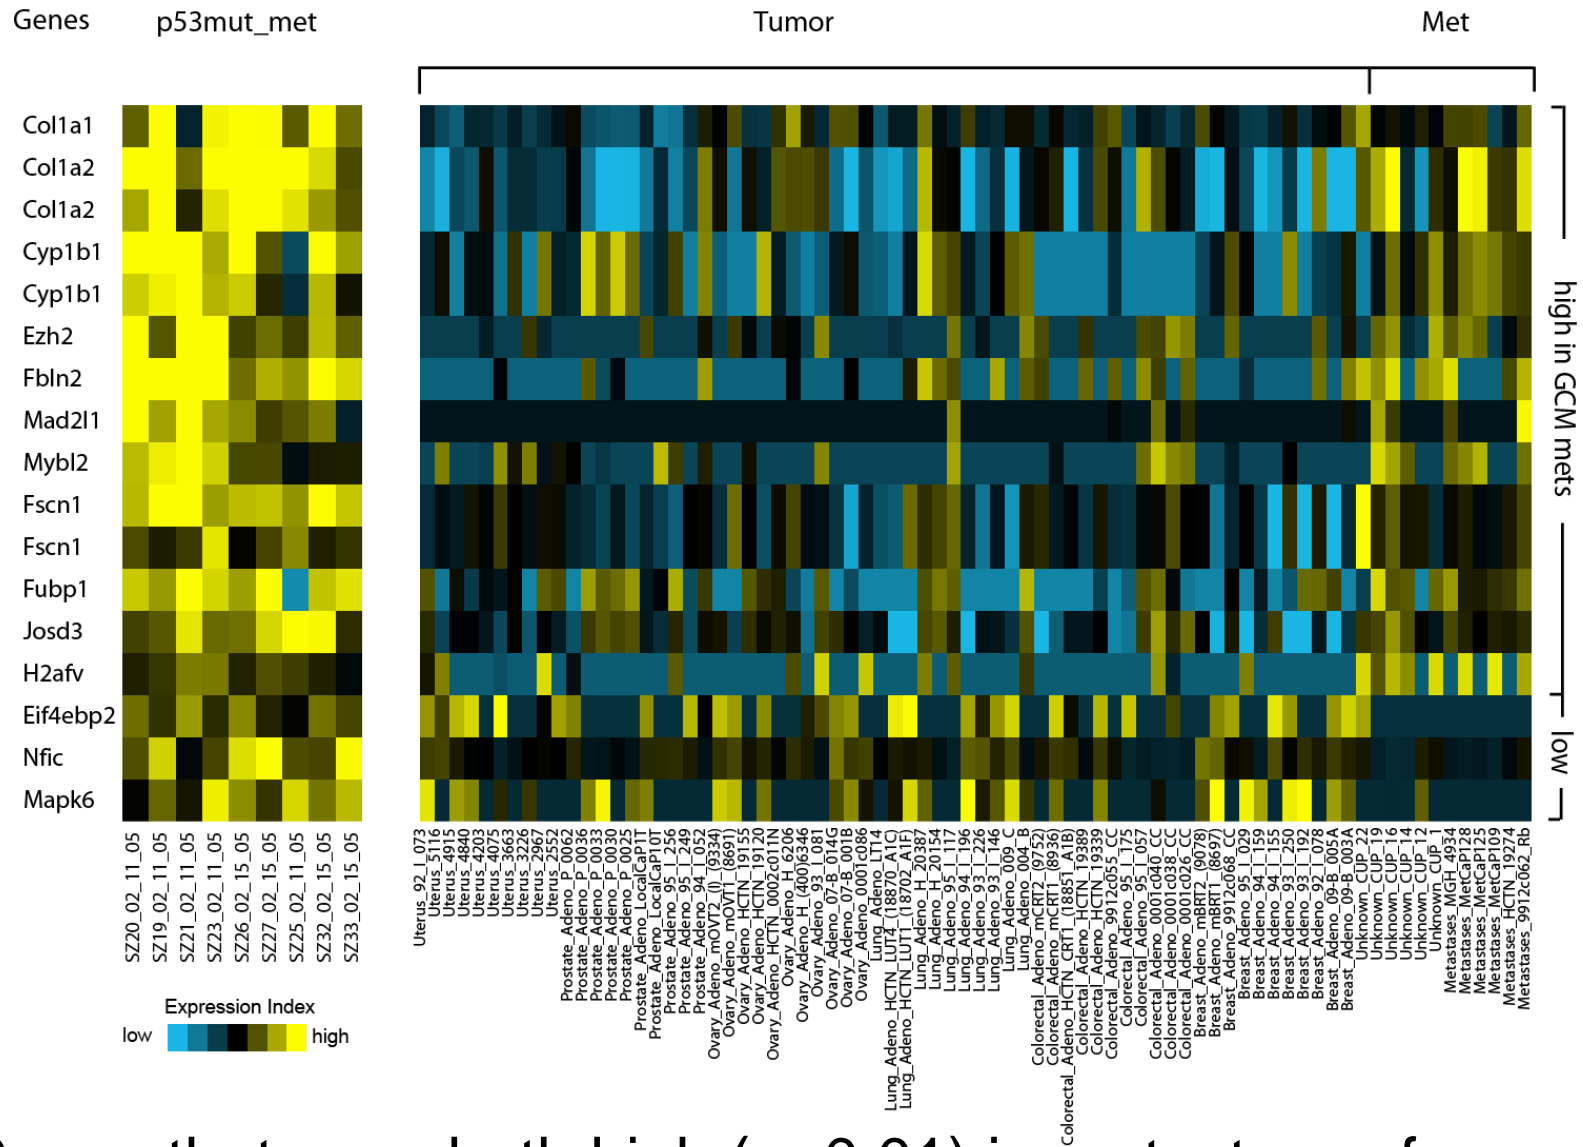

- Genes that were both high ( $p < 0.01$ ) in metastases from p53 mutant mice and differentially expressed ( $p < 0.01$ ) in human metastases compared to primary tumors (various histological types).

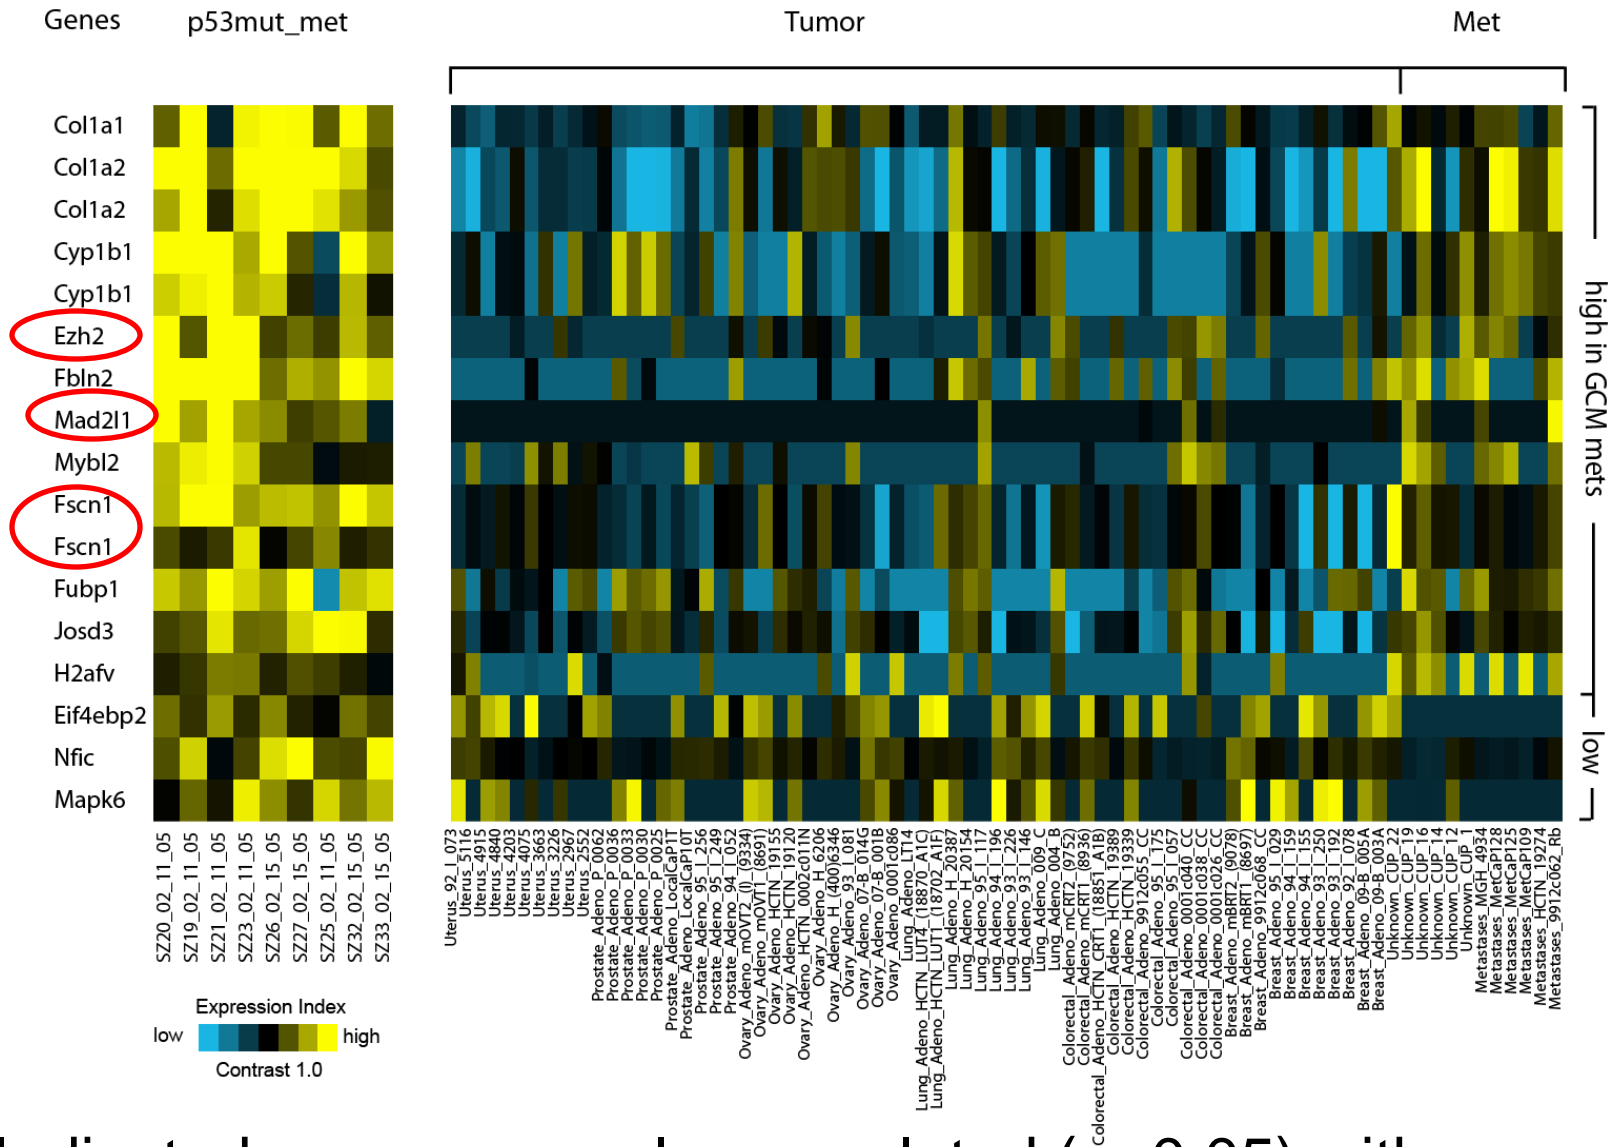

- Indicated genes were also correlated ( $p < 0.05$ ) with poor prognosis in profiles of human primary lung tumors (from dataset by Bhattacharjee *et al.*).

# Conclusions

- Some degree of significant overlap between genes high in human metastasis versus primary tumors and genes high in our mouse metastasis model.
  - Unable to do a paired analysis in the human dataset, but we cannot tell whether that would be an issue here as to why the overlap was not more significant
- Overlap not significant for the genes *low* in metastasis (results not shown).
